# Supplementary material
Source: Springer Nature journal article supplement (https://www.springermedizin.de/resource/supplementary/12885_2013_4026_MOESM1_ESM.pdf/9465052)
Supplement: MOESM1 [file 9465052]

Mailing (n=16,080):  
invitation letters  
to female inhabitants  
(50-69 y) of participating  
municipalities

Media attention: newsletter  
articles, television, radio and  
events

Positive responses screened on eligibility  
by telephone (n=1,286)

Subject information  
mailed to eligible women

Screening visit and  
Informed consent (n=283)

Randomisation and Baseline visit (n=243)

Diet group (n=97)

Exercise group (n=98)

Control group (n=48)
